# Supplementary material for: Oxygenated copper vanadium selenide composite nanostructures as a cathode material for zinc-ion batteries with high stability up to 10 000 cycles
Source: Royal Society of Chemistry journal article supplement (doi:10.1039/d2nr06648c), 2023-01-01
Supplement: d2nr06648c1.pdf [file d2nr06648c1.pdf]

## Electronic Supplementary Information

### **Oxygenated copper vanadium selenide composite nanostructures as a cathode material for zinc-ion batteries with high stability up to 10 000 cycles**

D. Narsimulu, B. N. Vamsi Krishna, R. Shanthappa, and Jae Su Yu\*

*Department of Electronics and Information Convergence Engineering, Institute for Wearable Convergence Electronics, Kyung Hee University, 1732 Deogyong-aero, Giheung-gu, Yongin-si, Gyeonggi-do 17104, Republic of Korea*

\*Corresponding author.

Email address: jsyu@khu.ac.kr (J. S. Yu)

## **1. Experimental procedure**

### ***1.1. Materials***

Following chemicals, such as copper (II) nitrate trihydrate ( $\text{CuH}_6\text{N}_2\text{O}_9$ , Sigma Aldrich, 99%), selenious acid ( $\text{Se}_2\text{H}_2\text{O}_3$ , Sigma Aldrich, 99%), 2-methylimidazole ( $\text{C}_4\text{H}_6\text{N}_2$ , Sigma Aldrich, 99%), ammonia meta vanadate ( $\text{NH}_4\text{VO}_3$ , Sigma Aldrich, 99%), metallic Zn (Sigma Aldrich, 0.1 cm thickness), zinc trifluoromethanesulfonate ( $\text{Zn}(\text{CF}_3\text{SO}_3)_2$ , Sigma Aldrich, 98%), and ZnCF (Sigma Aldrich, 98%), were utilized without further purification. The carbon fiber cloth (CFC) textile was received from the Nara Cell-Tech Corp., South Korea. Distilled water was produced in our laboratory by using a Milli-Q water equipment.

### ***1.2. Material characterizations***

The phase confirmation of the prepared samples was analyzed by X-ray diffraction (XRD; Rigaku MiniFlex 600 X-ray diffractometer with  $\text{Cu K}_\alpha$  radiation). The morphology and fine structure of the powder sample were characterized by using a field-emission scanning electron microscope (FE-SEM; JEOL JSM-7500F) and a transmission electron microscope (TEM, JEOL- JEM). The valance states of the sample were examined by X-ray photoelectron spectroscopy (XPS; PHI 5000 VersaProbe ESCALAB 250xi).

### ***1.3. Electrochemical measurements***

The O-CuVSe cathode material slurry was prepared by mixing 70 wt% of active material, 15 wt% polyvinylidene fluoride, and 15 wt% of super P carbon in N-methyl 2 pyrrolidinone solvent. The well-mixed slurry was coated on a CFC substrate using a brush. The electrode was dried at 80 °C for 12 h in a vacuum over. After proper drying, O-CuVSe coated CFC was cut into circular discs. The mass loading of active material over the CFC substrate is around 1–2  $\text{mg cm}^{-2}$ . The CR2032 coin-type cells were assembled in an air atmosphere using 2M ZnCF as an electrolyte, Zn metal

was employed as an anode, and GF/D glass fiber membrane (Whatman) was used as a separator. The galvanostatic charge-discharge (GCD) curves at various current densities and cyclic voltammetry (CV) curves at various scan rates were measured using the Wonna Tech battery cycler between the potential window of 0.4-2.0 V (vs. Zn/Zn<sup>2+</sup>).

**Table S1.** Comparison of the electrochemical performance of the O-CuVSe cathode material along with the previously reported cathode materials.

| Cathode material                                                                   | Electrolyte                                                                          | Voltage (V)    | Reversible capacity (mA h g <sup>-1</sup> ) | Current density (A g <sup>-1</sup> ) | Cycles                         | Ref.             |
|------------------------------------------------------------------------------------|--------------------------------------------------------------------------------------|----------------|---------------------------------------------|--------------------------------------|--------------------------------|------------------|
| Cu <sub>2-x</sub> Se                                                               | 2M ZnSO <sub>4</sub>                                                                 | 0.4–1.6        | 70                                          | 5                                    | 3000                           | 1                |
| ZnMn <sub>2</sub> O <sub>4</sub> /Mn <sub>2</sub> O <sub>3</sub>                   | 2M ZnSO <sub>4</sub>                                                                 | 0.8–1.9        | 80                                          | 1                                    | 1000                           | 2                |
| ZnMn <sub>2</sub> O <sub>4</sub>                                                   | 2M ZnSO <sub>4</sub> with 0.05M MnSO <sub>4</sub>                                    | 0.8–1.9        | 106.5                                       | 0.1                                  | 300                            | 3                |
| Ni <sub>x</sub> Mn <sub>3-x</sub> O <sub>4</sub>                                   | (2M ZnSO <sub>4</sub> with 0.15M MnSO <sub>4</sub>                                   | 1.0-1.8        | 128.8                                       | 0.4                                  | 850                            | 4                |
| ZnNi <sub>0.5</sub> Mn <sub>0.5</sub> CoO <sub>4</sub> @C                          | 2M ZnSO <sub>4</sub> with 0.1M MnSO <sub>4</sub>                                     | 1.0-1.8        | 110                                         | 0.2                                  | 500                            | 5                |
| MoS <sub>2</sub>                                                                   | 3M Zn(CF <sub>3</sub> SO <sub>3</sub> ) <sub>2</sub>                                 | 0.2-1.3        | 125                                         | 2                                    | 500                            | 6                |
| MoS <sub>2</sub> @N                                                                | 3M Zn(CF <sub>3</sub> SO <sub>3</sub> ) <sub>2</sub>                                 | 0.2-1.3        | 100                                         | 1                                    | 600                            | 7                |
| MoO <sub>3</sub>                                                                   | 1M ZnSO <sub>4</sub>                                                                 | 0.2-1.9        | 35                                          | 1                                    | 1000                           | 8                |
| VS <sub>2</sub> @N-doped carbon                                                    | 3 M Zn(CF <sub>3</sub> SO <sub>3</sub> ) <sub>2</sub>                                | 0.2-1.8        | 144                                         | 1                                    | 600                            | 9                |
| α-MnO <sub>2</sub> @C                                                              | 1M ZnSO <sub>4</sub>                                                                 | 1.0-1.8        | 189                                         | 0.066                                | 50                             | 10               |
| MnO@NGS                                                                            | 2M ZnSO <sub>4</sub>                                                                 | 0.9 -1.8       | 112.3                                       | 0.5                                  | 300                            | 11               |
| Cu <sub>3</sub> V <sub>2</sub> O <sub>7</sub> (OH) <sub>2</sub> ·2H <sub>2</sub> O | 2.5M Zn(CF <sub>3</sub> SO <sub>3</sub> ) <sub>2</sub>                               | 0.2-1.6        | 100.1                                       | 0.2                                  | 130                            | 12               |
| CuHCF                                                                              | 1M ZnSO <sub>4</sub>                                                                 | 1.4-2.0        | 44                                          | 0.1                                  | 50                             | 13               |
| CuHCF                                                                              | 1M ZnSO <sub>4</sub>                                                                 | 0.8-1.9        | 40                                          | 0.02                                 | 20                             | 14               |
| CuHCF                                                                              | 20mM ZnSO <sub>4</sub>                                                               | 1.4-2.1        | 53                                          | 1                                    | 50                             | 15               |
| ZnHCF                                                                              | 1M ZnSO <sub>4</sub>                                                                 | 0.8-2.0        | 49.4                                        | 0.06                                 | 100                            | 16               |
| ZnHCF@MnO <sub>2</sub>                                                             | 0.5M ZnSO <sub>4</sub>                                                               | 1.4-1.9        | 70                                          | 0.5                                  | 1000                           | 17               |
| ZnNi <sub>1/2</sub> Mn <sub>1/2</sub> CoO <sub>4</sub>                             | 0.3M Zn (OTf) <sub>2</sub> in MeCN                                                   | 0.9-2.15       | 174                                         | 1                                    | 200                            | 18               |
| Mo <sub>6</sub> S <sub>8</sub>                                                     | 1 M ZnSO <sub>4</sub>                                                                | 0.25-1.0       | 87.4                                        | 0.18                                 | 150                            | 19               |
| CC@MnO <sub>2</sub> @MXene                                                         | 0.1M Mn(CH <sub>3</sub> COO) <sub>2</sub> with 0.01M Na <sub>2</sub> SO <sub>4</sub> | 0.8-1.9        | 80.6                                        | 1                                    | 800                            | 20               |
| <b>O-CuVSe</b>                                                                     | <b>2M Zn(CF<sub>3</sub>SO<sub>3</sub>)<sub>2</sub></b>                               | <b>0.4-2.0</b> | <b>166.6<br/>117</b>                        | <b>1<br/>2<br/>5</b>                 | <b>1000<br/>2000<br/>10000</b> | <b>This work</b> |

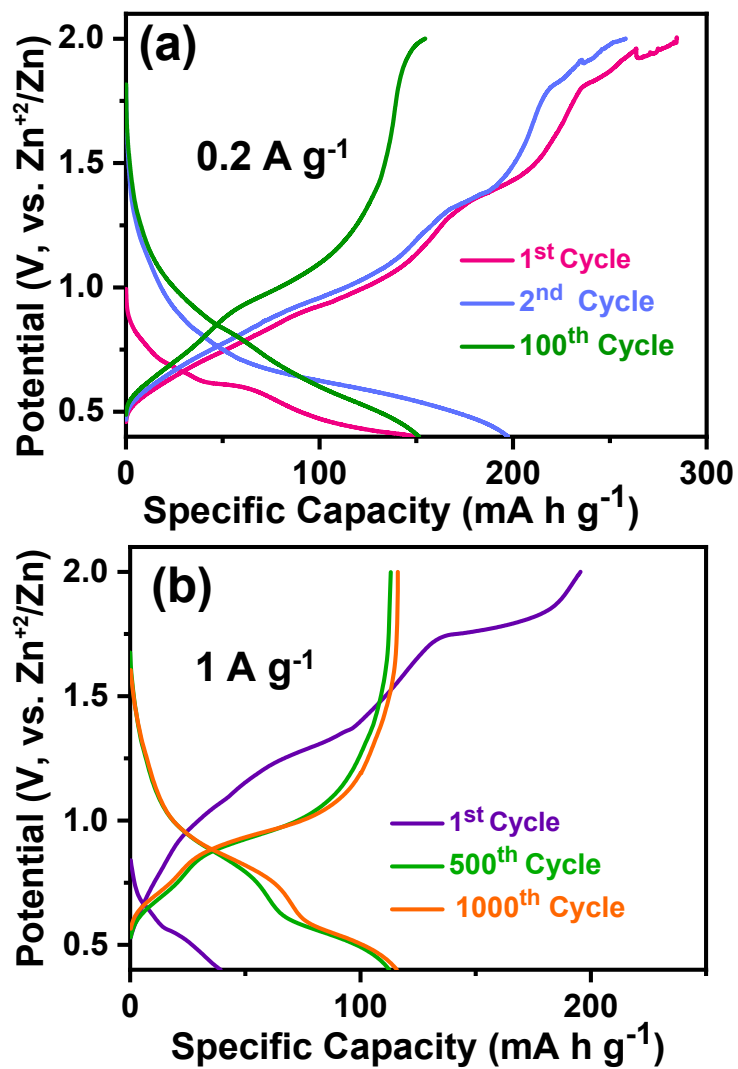

**Fig. S1** Cycling performance of the O-CuVSe cathode at (a) 0.2 A g<sup>-1</sup> and (b) 1 A g<sup>-1</sup>.

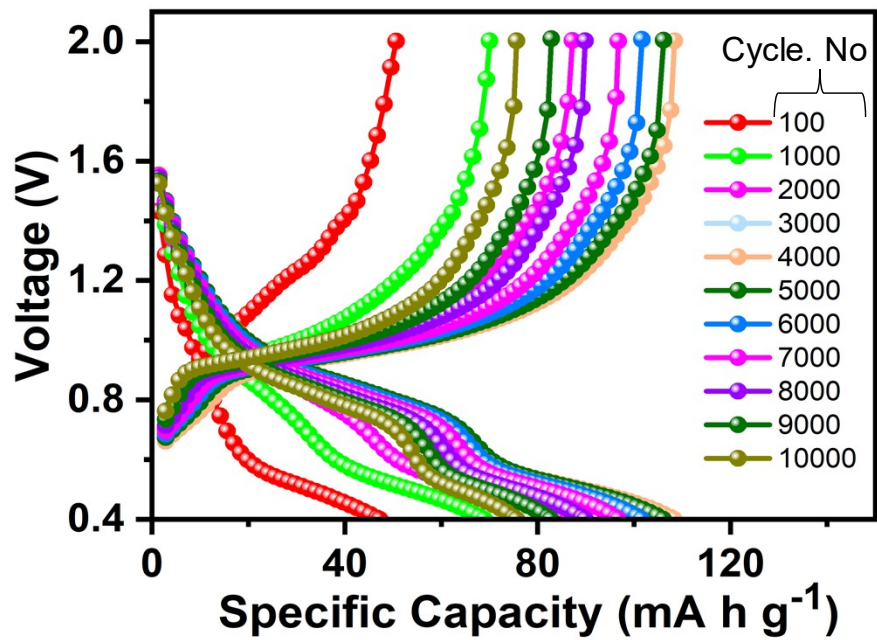

Fig. S2 Voltage profile curves of the O-CuVSe cathode at 5 A g<sup>-1</sup>.

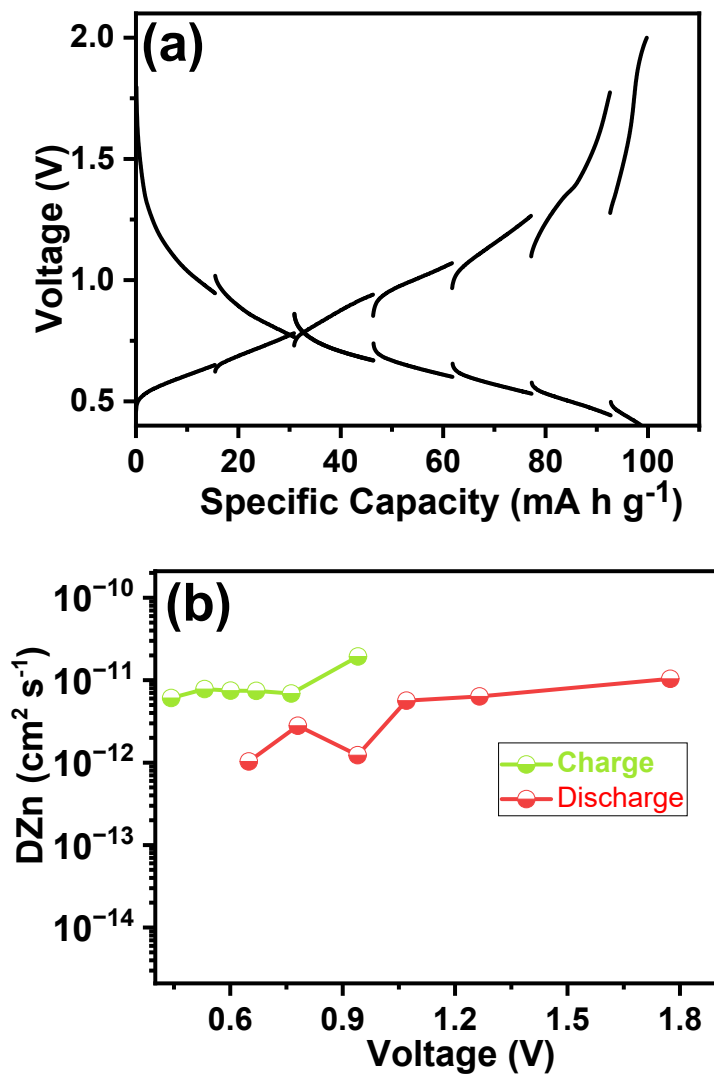

**Fig. S3** (a) GITT curves and (b) corresponding diffusivity coefficient for Zn<sup>2+</sup> in Zn/O-CuVSe battery vs. voltage.

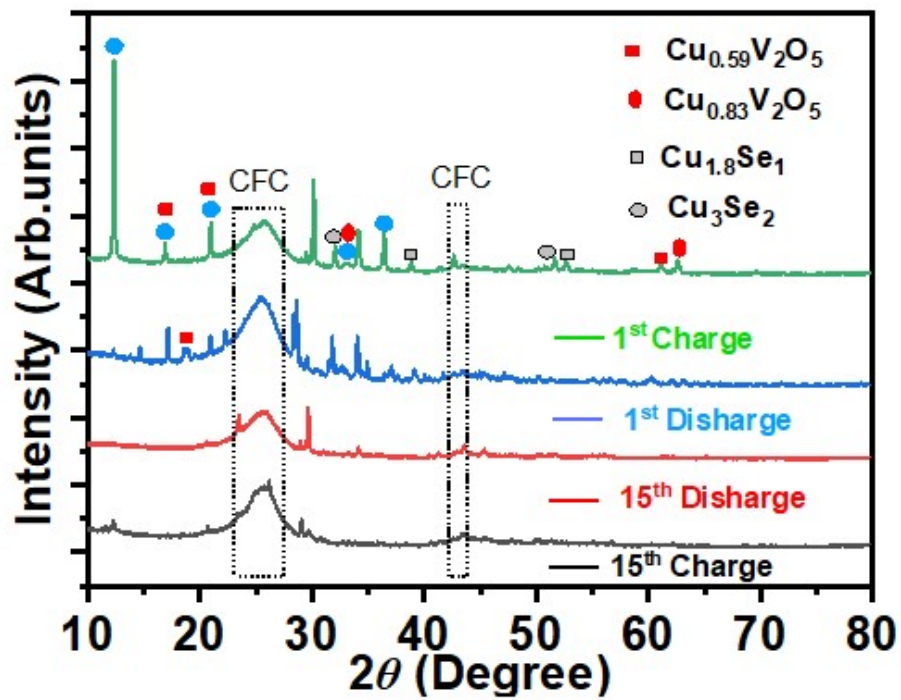

**Fig. S4** Ex-situ XRD patterns of the O-CuVSe composite cathode measured after the 1<sup>st</sup> charge/discharge and 15<sup>th</sup> charge/discharge cycles.



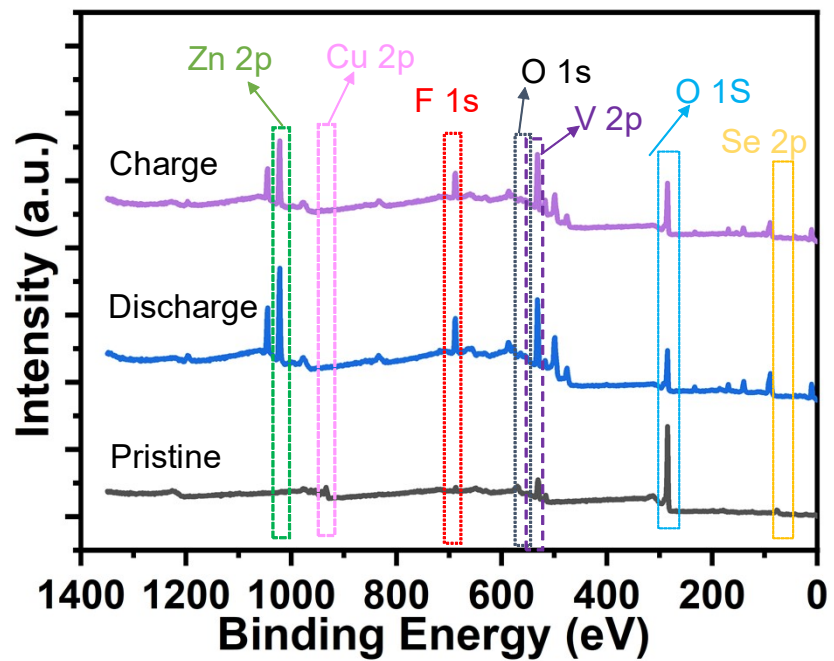

**Fig. S5** XPS survey scan spectra of the O-CuVSe cathode in pristine, charge, and discharge states.

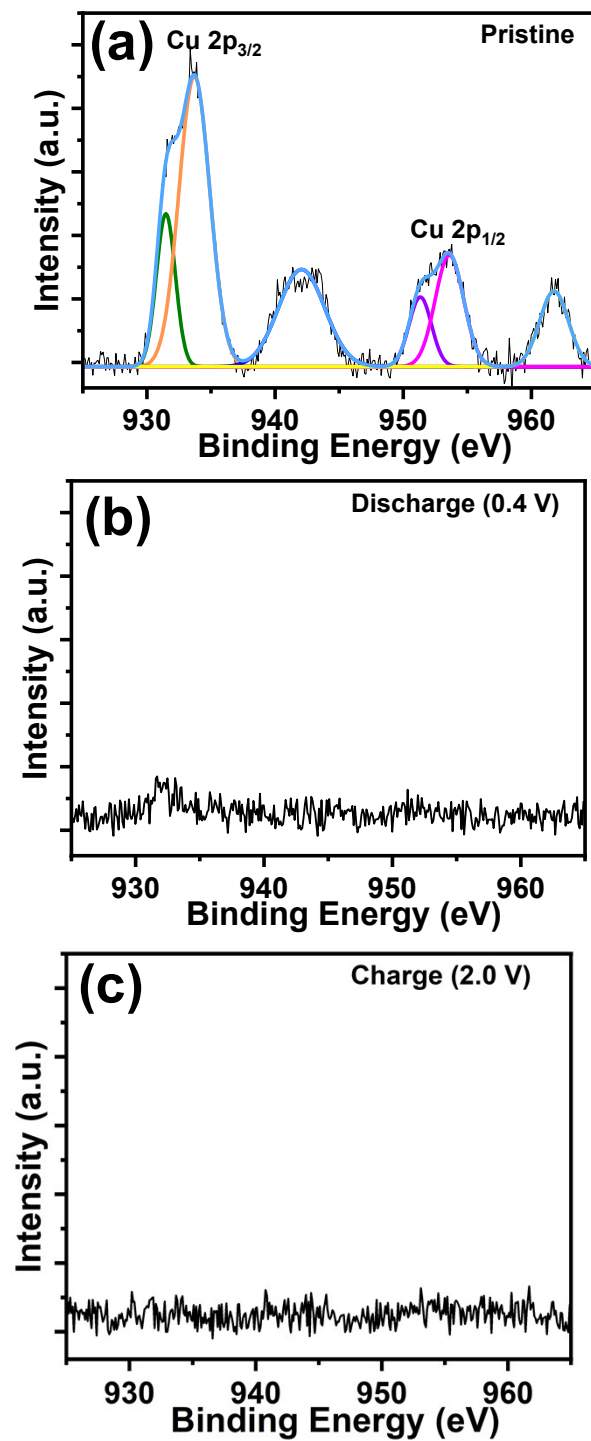

**Fig. S6** High-resolution Cu 2p XPS spectra: (a) pristine state, (b) discharge state, and (c) charge state.

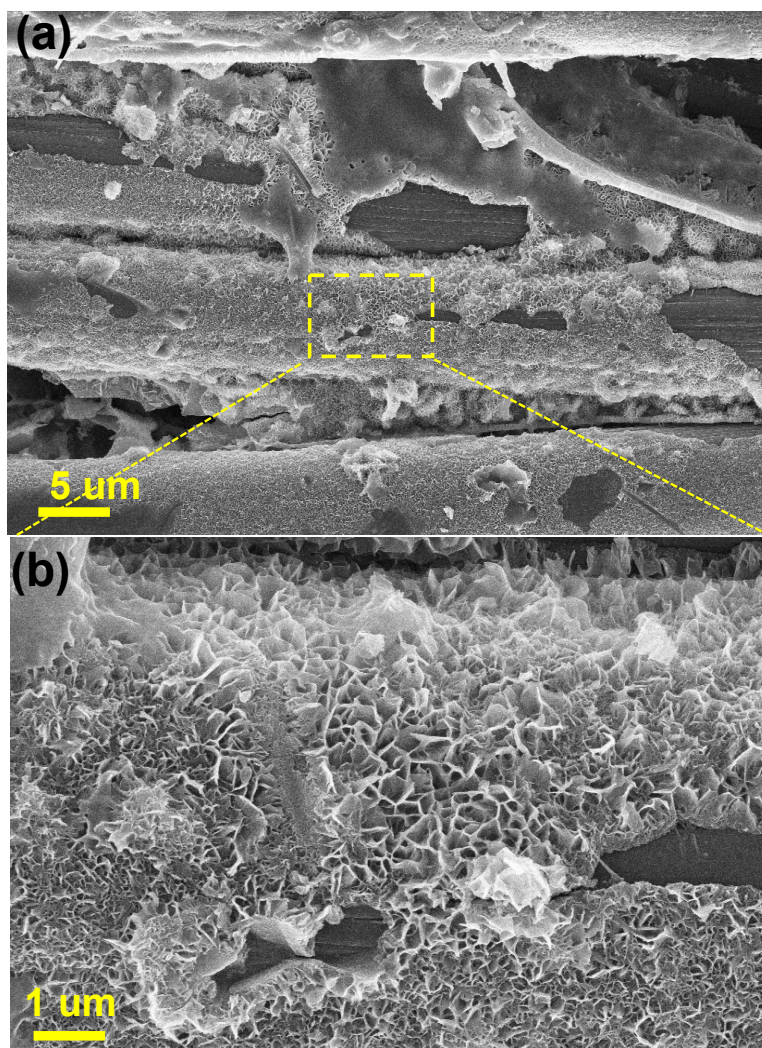

**Fig. S7** (a) Low- and (b) high-magnification FE-SEM images for the O-CuVSe cathode after 2000 cycles at 2 A g<sup>-1</sup>.

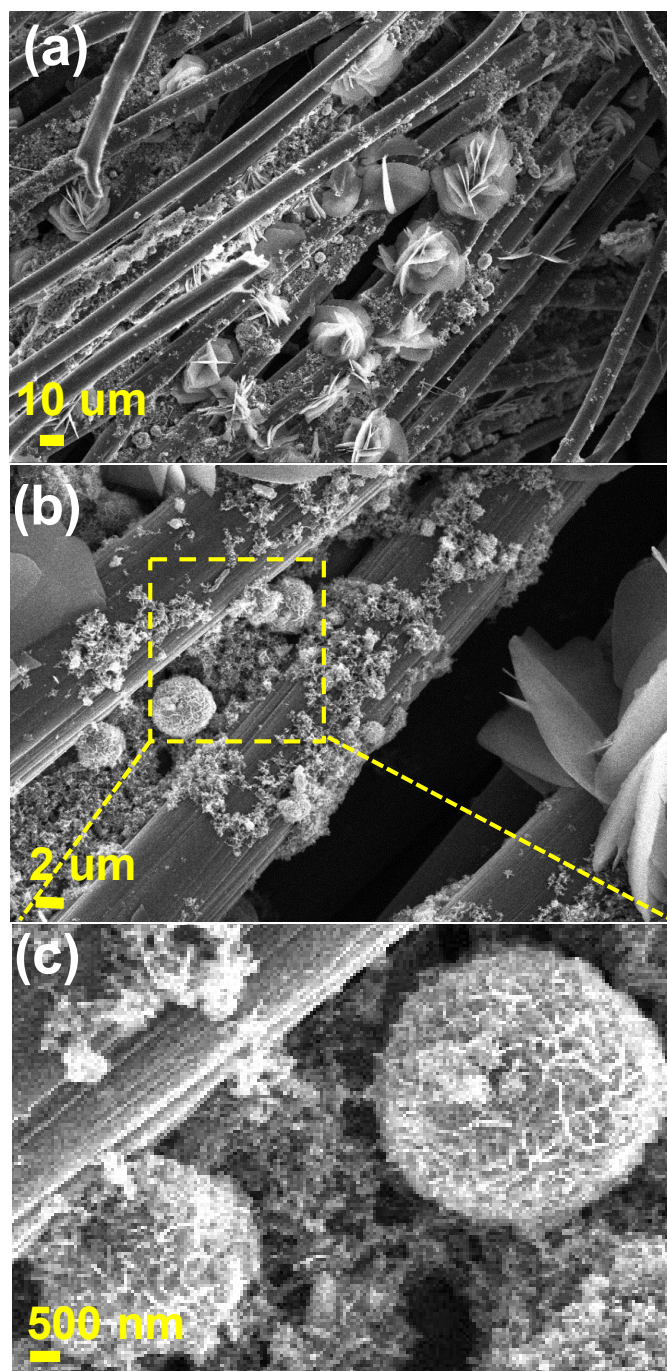

**Fig. S8** (a-c) FE-SEM images under different magnifications for the O-CuVSe cathode after 10000 cycles at 5 A g<sup>-1</sup>.

## References

1. Y. Yang, J. Xiao, J. Cai, G. Wang, W. Du, Y. Zhang, X. Lu, and C. C. Li, *Adv. Funct. Mater.*, 2021, **31**, 2005092.
2. S.-C. Ma, M. Sun, S.-X. Wang, D.-S. Li, W.-L. Liu, M.-M. Ren, F.-G. Kong, S.-J. Wang, and Y.-M. Xia, *Scr. Mater.*, 2021, **194**, 113707.
3. X. Wu, Y. Xiang, Q. Peng, X. Wu, Y. Li, F. Tang, R. Song, Z. Liu, Z. He, and X. Wu, *J. Mater. Chem. A*, 2017, **5**, 17990-17997.
4. J. Long, J. Gu, Z. Yang, J. Mao, J. Hao, Z. Chen, and Z. Guo, *J. Mater. Chem. A*, 2019, **7**, 17854-17866.
5. F. Xing, X. Shen, Y. Chen, X. Liu, T. Chen, and Q. Xu, *Dalton Trans.*, 2021, **50**, 5795-5806.
6. C. Cai, Z. Tao, Y. Zhu, Y. Tan, A. Wang, H. Zhou, and Y. Yang, *Nanoscale Adv.*, 2021, **3**, 3780-3787.
7. Z. Sheng, P. Qi, Y. Lu, G. Liu, M. Chen, X. Gan, Y. Qin, K. Hao, and Y. Tang, *ACS Appl. Mater. Interfaces*, 2021, **13**, 34495-34506.
8. T. Xiong, Y. Zhang, Y. Wang, W. S. V. Lee, and J. Xue, *J. Mater. Chem. A*, 2020, **8**, 9006-9012.
9. J. Liu, W. Peng, Y. Li, F. Zhang, and X. Fan, *Mater. Chem. C*, 2021, **9**, 6308-6315.
10. S. Islam, M. H. Alfaruqi, J. Song, S. Kim, D. T. Pham, J. Jo, S. Kim, V. Mathew, J. P. Baboo, and Z. Xiu, *J. Energy Chem.*, 2017, **26**, 815-819.
11. W. Li, X. Gao, Z. Chen, R. Guo, G. Zou, H. Hou, W. Deng, X. Ji, and J. Zhao, *Chem. Eng. J.*, 2020, **402**, 125509.
12. L. Chen, Z. Yang, J. Wu, H. Chen, and J. Meng, *Electrochim. Acta*, 2020, **330**, 135347.

13. S. Kjeldgaard, M. Wagemaker, B. B. Iversen, and A. Bonten, *Mat. Adv.*, 2021, **2**, 2036-2044.
14. Z. Jia, B. Wang, and Y. Wang, *Mater. Chem. Phys.* 2015, **149**, 601-606.
15. R. Trócoli and F. La Mantia, *ChemSusChem*, 2015, **8**, 481-485.
16. L. Zhang, L. Chen, X. Zhou, and Z. Liu, *Adv. Energy Mater.*, 2015, **5**, 1400930.
17. K. Lu, B. Song, Y. Zhang, H. Ma, and J. Zhang, *J. Mater. Chem. A*, 2017, **5**, 23628-23633.
18. C. Pan, R. Zhang, R. G. Nuzzo, and A. A. Gewirth, *Adv. Energy Mater.*, 2018, **8**, 1800589.
19. Y. Cheng, L. Luo, L. Zhong, J. Chen, B. Li, W. Wang, S. X. Mao, C. Wang, V. L. Sprenkle, and G. Li, *ACS Appl. Mater. Interfaces*, 2016, **8**, 13673-13677.
20. M. Qi, F. Li, Z. Zhang, Q. Lai, Y. Liu, J. Gu, and L. Wang, *J. Colloid Interface Sci.*, 2022, **615**, 151-162.
